# Supplementary material for: Investigating the self-assembly and shape transformation of poly(ethylene glycol)-b-poly(d,l-lactide) (PEG-PDLLA) polymersomes by tailoring solvent-polymer interactions
Source: Royal Society of Chemistry journal article supplement (doi:10.1039/c9py01089k), 2019-09-10
Supplement: c9py01089k1.pdf [file c9py01089k1.pdf]

# **Investigating the Self-Assembly and Shape Transformation of poly(ethylene glycol)-b-poly(D,L-lactide) (PEG-PDLLA) Polymersomes by Tailoring Solvent-Polymer Interactions**

**Imke A.B. Pijpers, Fenghua Meng, Jan C.M. van Hest\* and Loai K.E.A. Abdelmohsen\***

**Supporting Information**

## S1. Experimental Materials and Methods

### *Materials*

All chemicals were used as received unless stated otherwise. For the synthesis of poly(ethylene glycol)-*b*-poly(D,L-lactide) (PEG-PDLLA), poly(ethylene glycol) 1K was purchased from JenKem technology and freeze-dried twice before use. D,L-lactide was purchased from Acros and used as supplied. 1,8-Diazabicyclo[5.4.0]undec-7-ene (DBU) was purchased from Sigma Aldrich and used as supplied. All other chemicals were supplied by Sigma-Aldrich and were used without any purification. Ultra pure MilliQ water, obtained from a Merck Millipore Q-Pod system (18.2 M $\Omega$ ) with a 0.22  $\mu$ m Millipore® Express 40 filter, was used for the polymersome self-assembly and dialysis. Dialysis membranes MWCO 12-14000 g mol<sup>-1</sup> Spectra/Por® were used for dialysis during the tubes formation. Sodium chloride was purchased from Merck.

### *Methods*

**Nuclear Magnetic Resonance (NMR):** Proton nuclear magnetic resonance measurements were performed on a Bruker 400 Ultrashield™ spectrometer equipped with a Bruker SampleCase autosampler, using CDCl<sub>3</sub> as a solvent and TMS as internal standard.

**Gel permeation chromatography (GPC):** GPC was conducted using a Shimadzu Prominence-*i* GPC system with a PL gel 5  $\mu$ m mixed D and mixed C column (Polymer Laboratories) with PS standard and equipped with a Shimadzu RID-20A differential refractive index detector and THF used as an eluent with a flow rate of 1 mL min<sup>-1</sup>.

**Dynamic Light Scattering (DLS):** DLS measurements were performed on a Malvern instrument Zetasizer (model Nano ZSP) equipped with an autosampler. Zetasizer software was used to process and analyse the data.

**Cryogenic transmission electron microscopy (cryo-TEM):** Experiments were performed using a FEI Titan (300 kV electron source) equipped with a LaB<sub>6</sub> filament and an autoloader station. Samples for cryo-TEM were prepared by treating the grids (Lacey carbon coated, R2/2, Cu, 200 mesh, EM sciences) in a Cressington 208 carbon coater for 40 seconds. Then, 4  $\mu$ l of the polymersome solution was pipetted on the grid and blotted in a Vitrobot MARK III at 100% humidity. The grid was blotted for 3 seconds (offset -3) and directly plunged and frozen in liquid ethane.

## S2.Experimental Procedures

*Ring opening polymerization (ROP) of poly(ethylene glycol)-poly(D,L-lactide) PEG-PDLLA block copolymers:*

PEG<sub>22</sub>-PDLLA<sub>45</sub> was synthesized according to previous publication by ring opening polymerization starting from PEG as macro initiator and using DBU as a catalyst yielding PEG<sub>22</sub>-PDLLA<sub>45</sub> polymer with  $\pm 80$  % yield. <sup>1</sup> Copolymer composition was determined by integrating the protons of PEG (3.65-3.7 ppm), terminal methyl unit (singlet at 3.37 ppm) and PDLLA CH (multiplet at 1.4-1.8 and 5.11-5.28 ppm).  $\bar{M}_w$  values were calculated to be less than 1.2 using GPC with PS standards for calibration.

*Preparation of spherical polymersomes:*

In a 15 mL vial, PEG<sub>22</sub>-PDLLA<sub>45</sub> was dissolved in 2 mL of THF and dioxane (4:1 v/v) unless stated otherwise and the vial was sealed with a rubber septum. The solution was stirred at 400 rpm for a minimum of 30 minutes prior to the addition of MilliQ (2 mL, 1 mL h<sup>-1</sup>) *via* a syringe pump. The resulting cloudy suspension was transferred into a prehydrated dialysis bag (SpectraPor, MWCO: 12-14 kDa, 2 mL/cm). Dialysis was performed against MilliQ at room temperature for max. 24 hours with a water change after 1 hour.

*Preparation of tubes:*

Polymersomes were prepared according to the above mentioned method. Dialysis was performed against 50 mM NaCl at 5 °C for max. 24 hours with a water change after 1 hour.

*Extrusion of spherical polymersomes:*

In a 15 mL vial, PEG<sub>22</sub>-PDLLA<sub>45</sub> was dissolved in 2 mL of THF and dioxane (4:1 v/v) unless stated otherwise and the vial was sealed with a rubber septum. 1 mL h<sup>-1</sup>) *via* a syringe pump. The resulting suspension was extruded through an Avanti Mini Extruder with a 0.1  $\mu$ m membrane filter in between filter supports. The solution was extruded for a minimum of 20 times. The resulting cloudy suspension was transferred into a prehydrated dialysis bag (SpectraPor, MWCO: 12-14 kDa, 2 mL/cm). Dialysis was performed against MilliQ at room temperature for max. 24 hours with a water change after 1 hour.

*Shape transformation of extruded spherical polymersomes into elongated tubes:*

Polymersomes were prepared according to the above mentioned extrusion method. Dialysis was performed against 100 mM NaCl at 5 °C for max. 24 hours with a water change after 1 hour.

### S3. Supplementary Figures

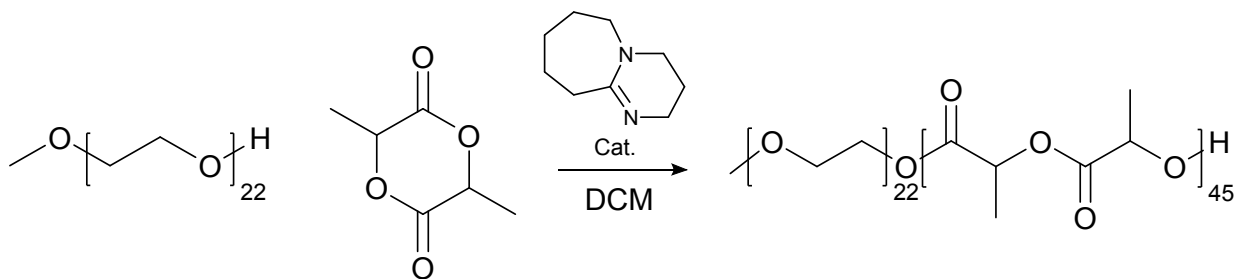

**Figure S1:** Organocatalyzed synthesis of PEG<sub>22</sub>-PDLLA<sub>45</sub> using DBU as catalyst.

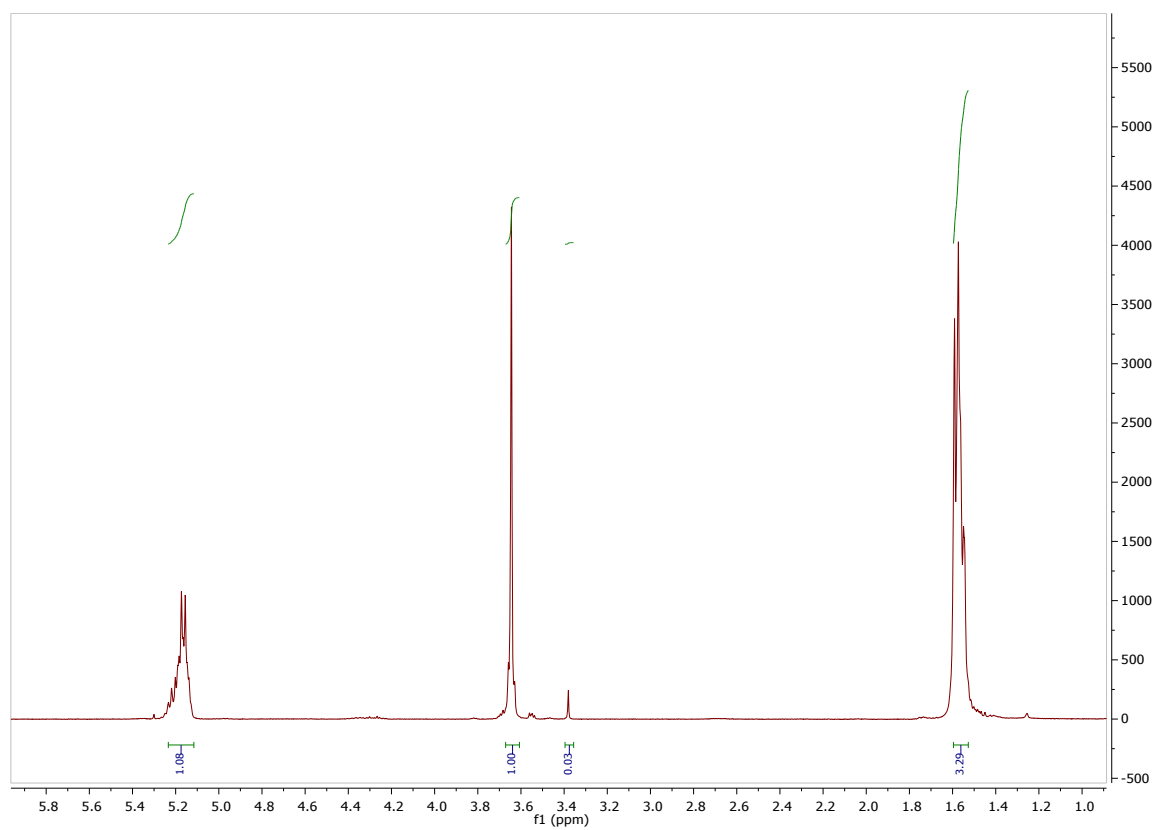

**Figure S2:** Typical <sup>1</sup>H-NMR spectrum of PEG<sub>22</sub>-PDLLA<sub>45</sub>

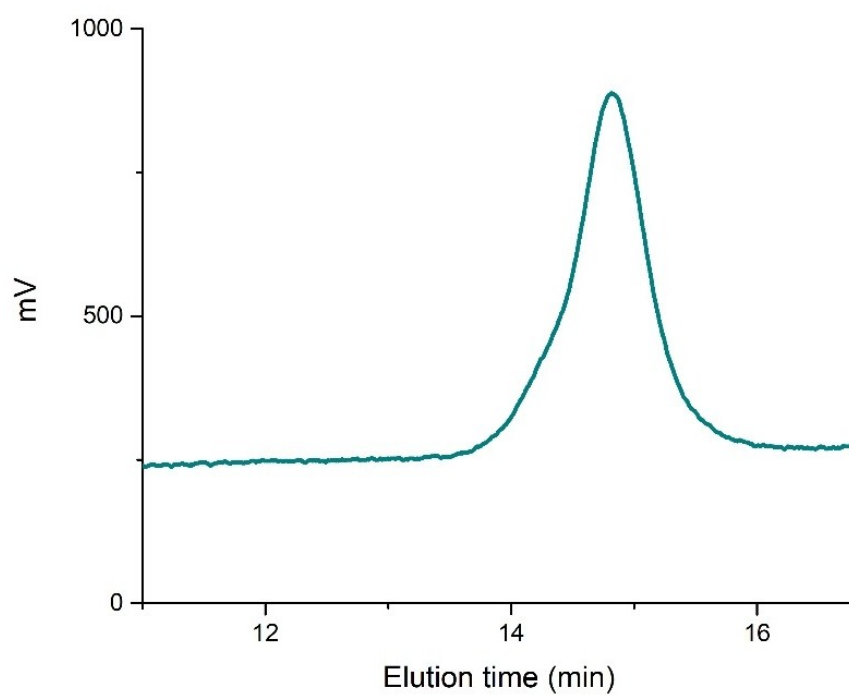

**Figure S3:** Typical GPC plot of PEG<sub>22</sub>-PDLLA<sub>45</sub>

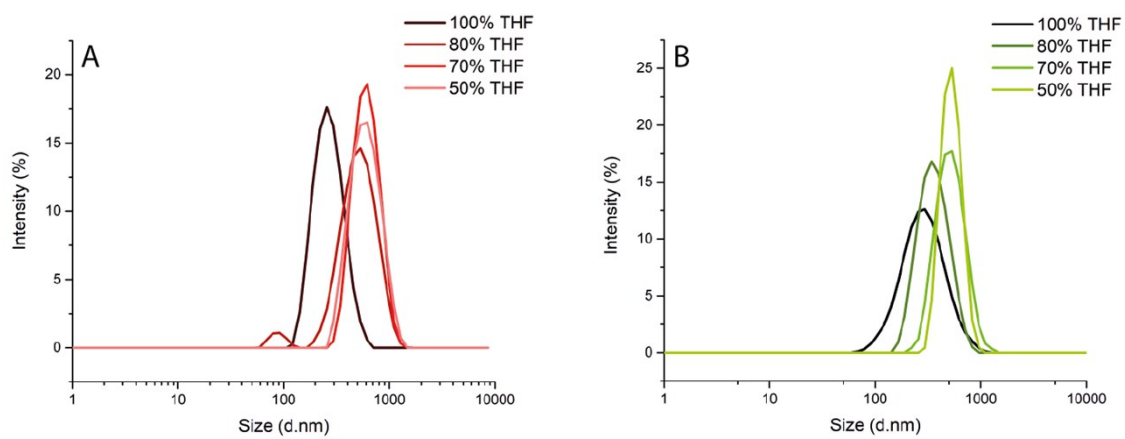

**Figure S4:** DLS intensity plots of spherical polymersomes (A) and tubes (B) prepared with various THF/Dioxane ratios.

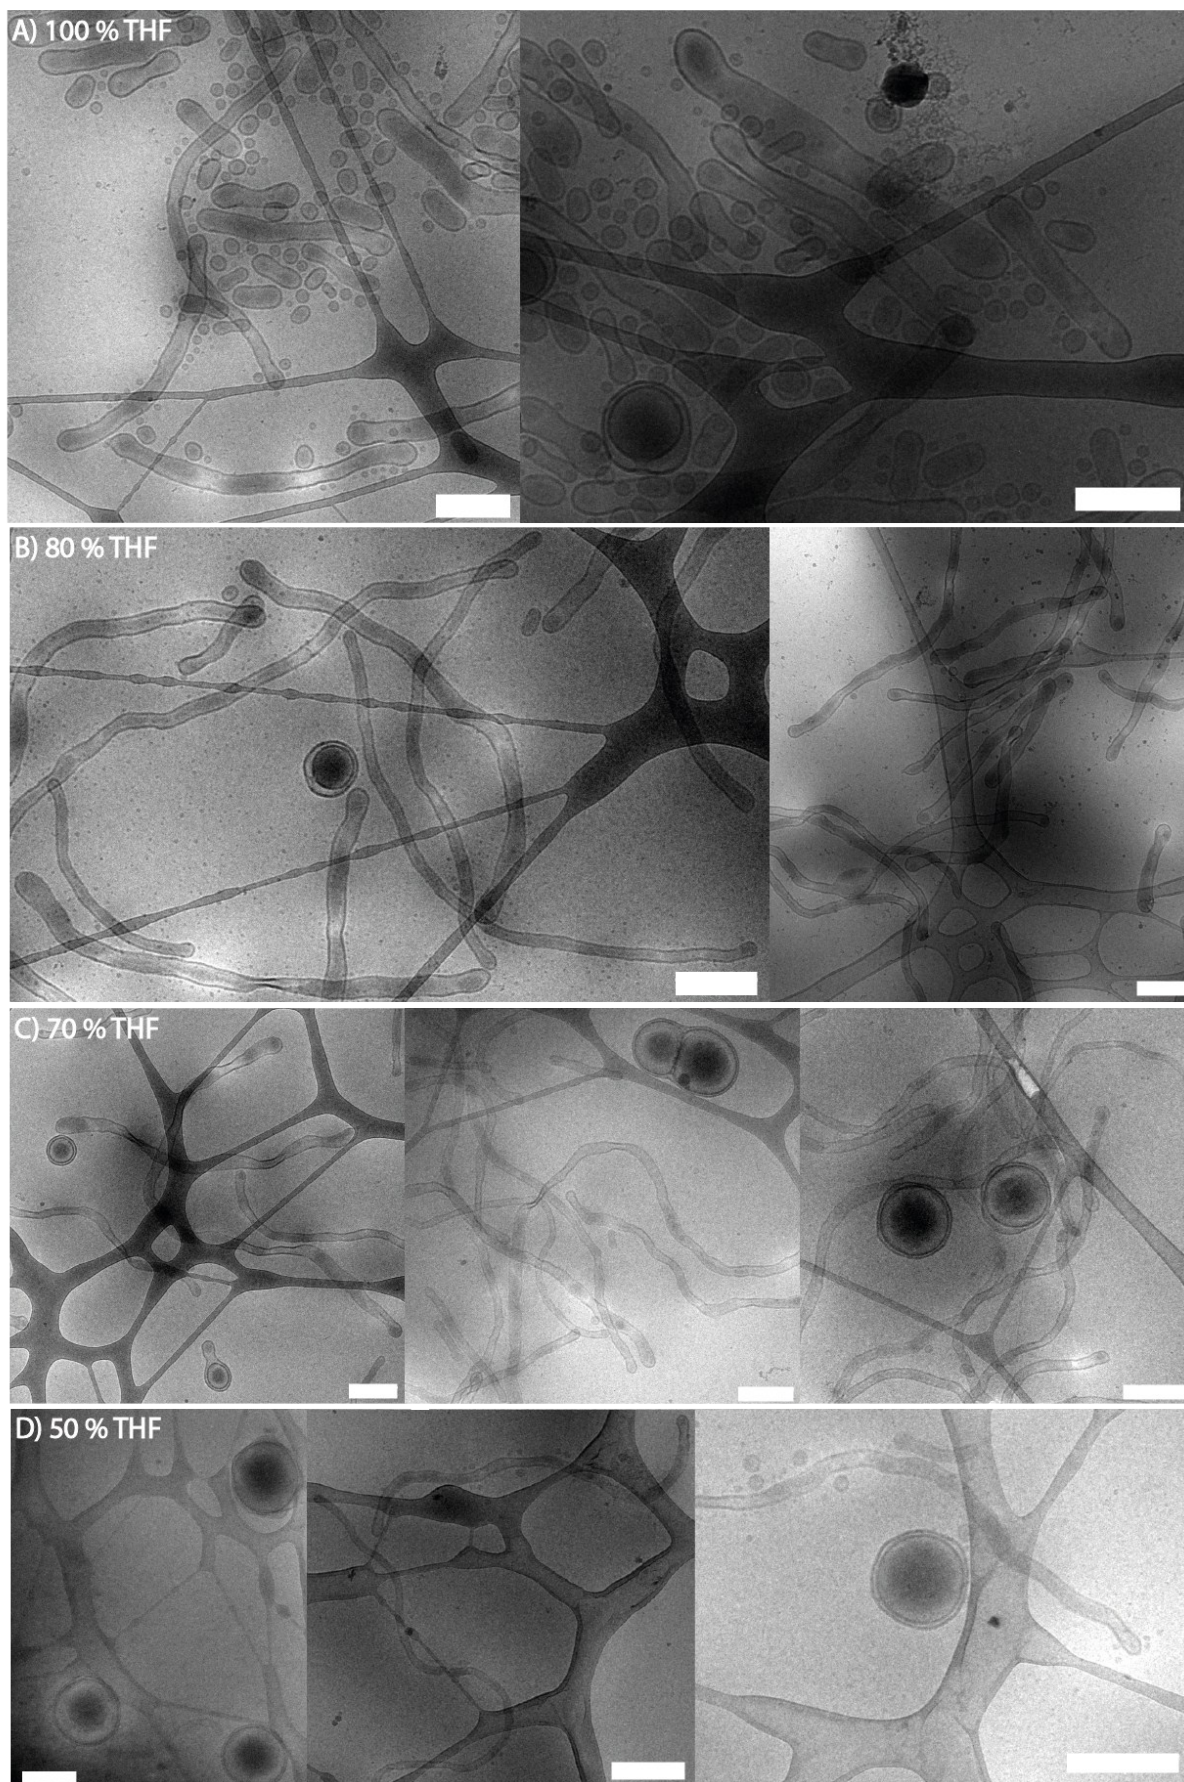

**Figure S5:** Cryo-TEM images of tubes prepared with THF/dioxane ratio A) 100/0, B) 80/20, C) 70/30 and D) 50/50. Scale bar is 500 nm

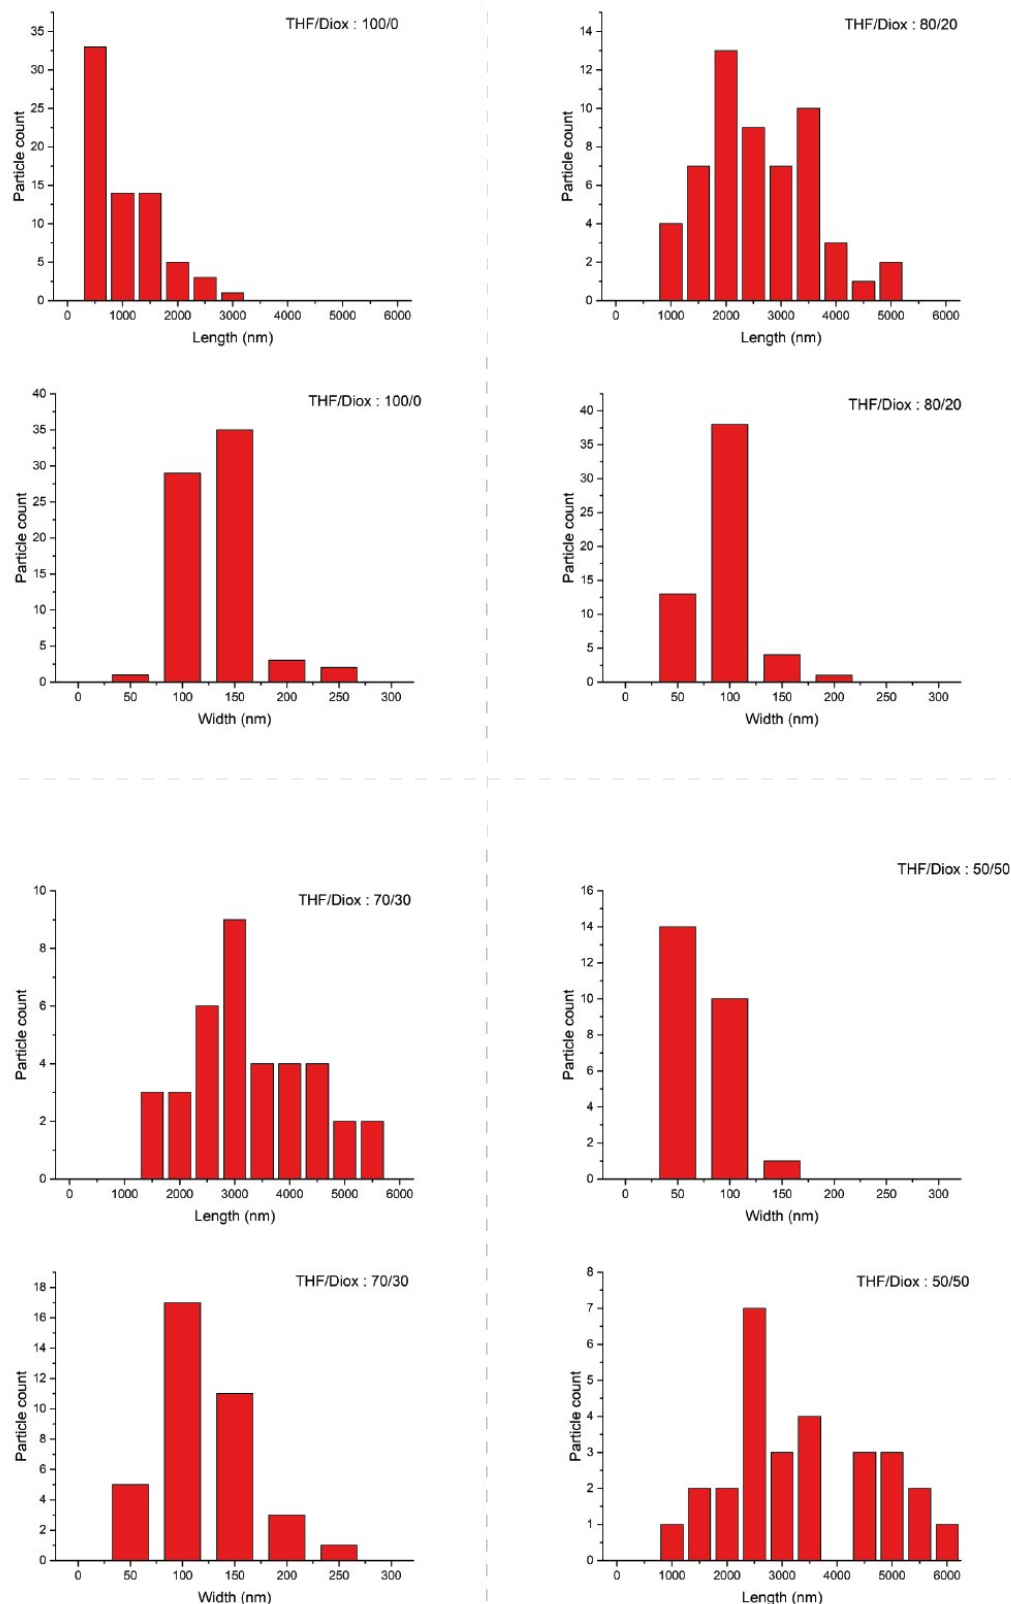

**Figure S6:** Bar graphs depicting the width and length of tubes measured from cryo-TEM images for each solvent ratio.



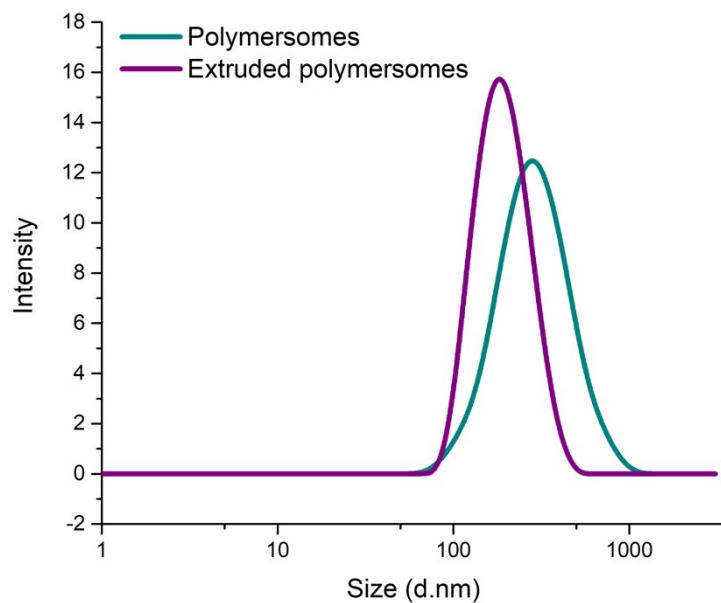

**Figure S7:** DLS intensity plot for polymersomes and extruded polymersomes demonstrating the size decrease after extrusion.

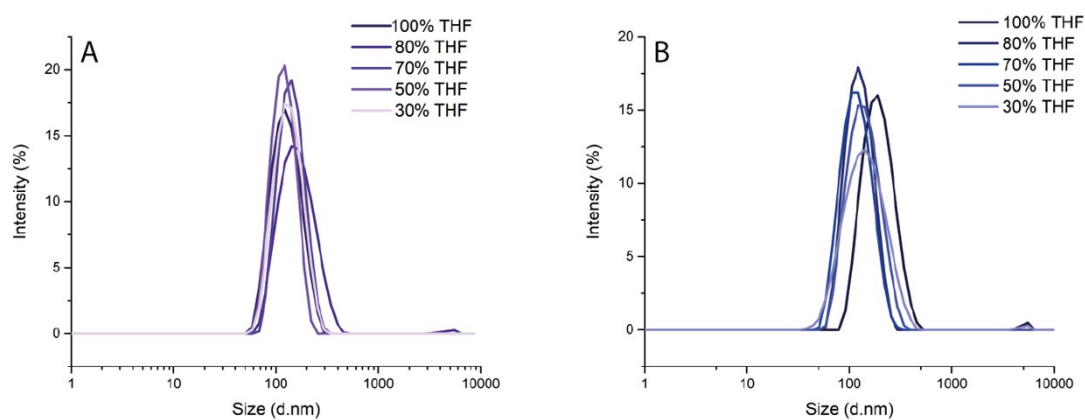

**Figure S8:** DLS data of extruded spherical polymersomes (A) and their counter tubes (B) prepared in various THF/dioxane ratios.



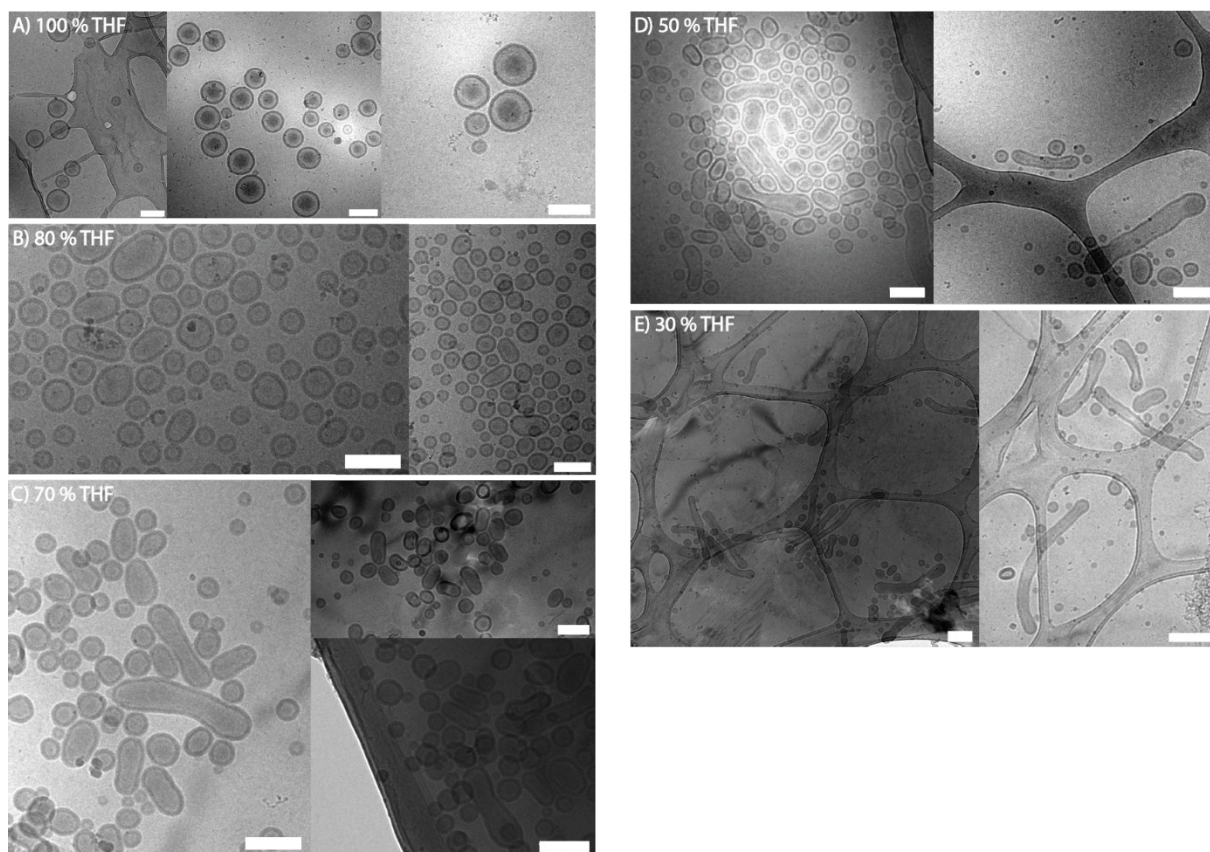

**Figure S9:** Cryo-TEM images of the outcome of the shape transformation process of the extruded spherical polymersomes, prepared with THF/dioxane ratio A) 100/0, B) 80/20, C) 70/30, D) 50/50 and E) 30/70. Scale bar is 200 nm.

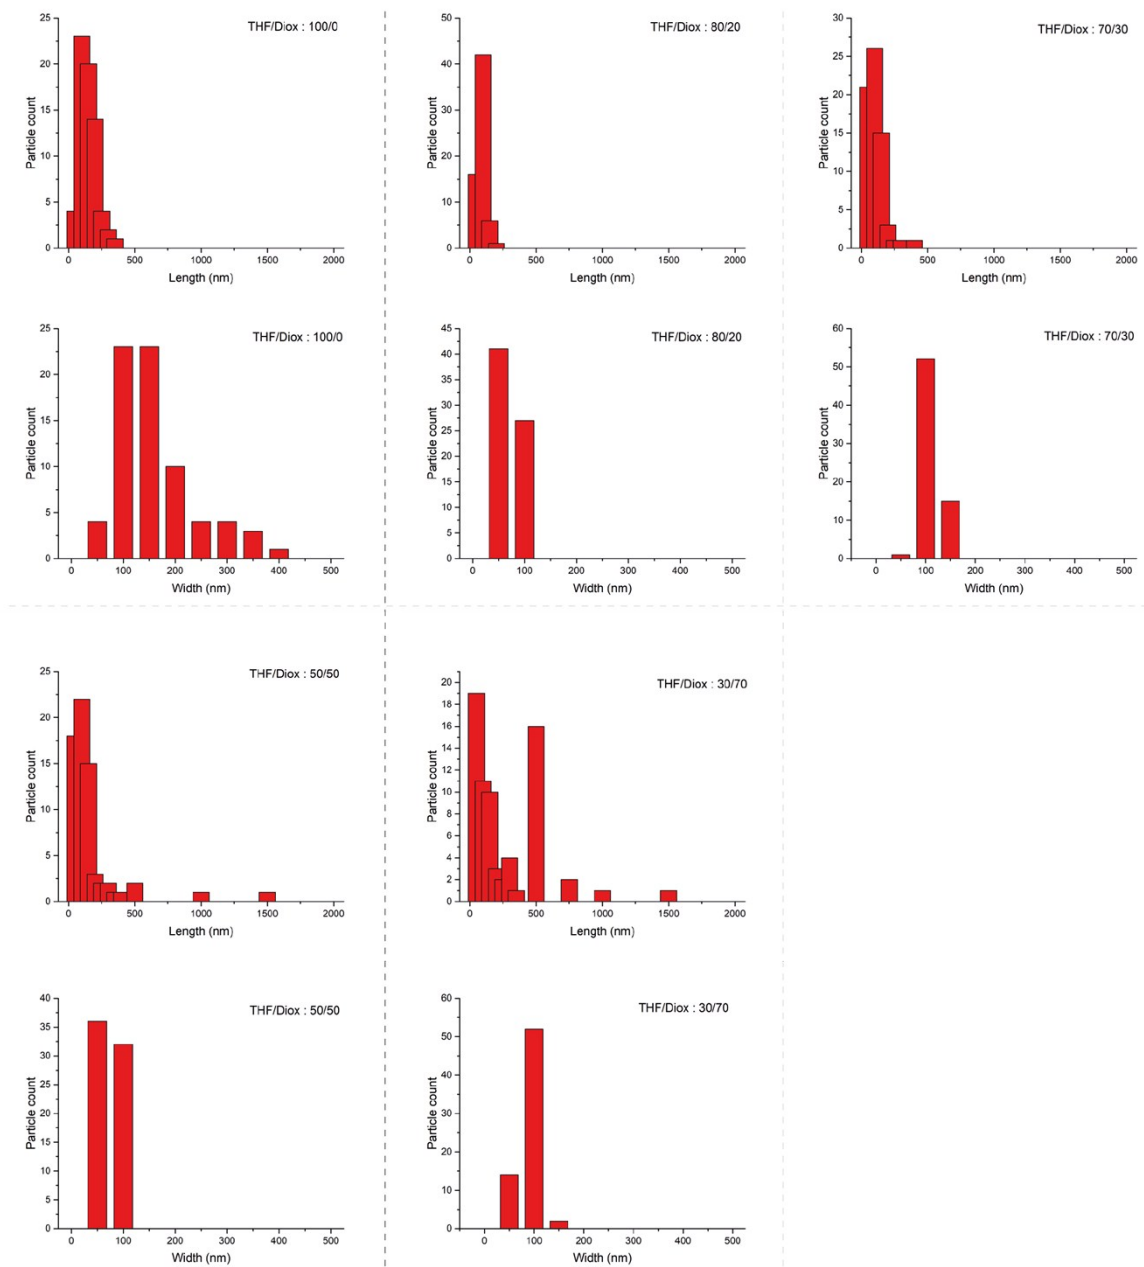

**Figure S10:** Bar graphs depicting the width and length of extruded tubes measured from cryo-TEM images for each solvent ratio.

## References:

- 1 L. K. E. A. Abdelmohsen, D. S. Williams, J. Pille, S. G. Ozel, R. S. M. Rikken, D. A. Wilson and J. C. M. Van Hest, *J. Am. Chem. Soc.*, 2016, **138**, 9353–9356.
